# Supplementary material for: The polymorphisms in the MGMT gene and the risk of cancer: a meta-analysis
Source: Springer Nature journal article supplement (doi:10.1007/s13277-013-0893-x), 2013-06-12
Supplement: MOESM1 [file 13277_2013_893_MOESM1_ESM.doc]

Supplement materials

Supplement Table 1. Distribution of *MGMT* genotypes and alleles among cancer patients and controls: (a), Leu84Phe; (b), Ile143Val; (c), Lys178Arg; (d), -485C/A; (e), Leu53Leu.

(a), Leu84Phe

| Author | Case | | | Control | | | Case | | Control | | HWE |
| --- | --- | --- | --- | --- | --- | --- | --- | --- | --- | --- | --- |
| Leu/Leu | Leu/Phe | Phe/Phe | Leu/Leu | Leu/Phe | Phe/Phe | Leu | Phe | Leu | Phe |
| Agalliu, I(AF)I | 106 | 35 | 6 | 60 | 20 | 1 | 247 | 47 | 140 | 22 | Yes |
| Agalliu, I(CA)I | 949 | 269 | 32 | 916 | 298 | 23 | 2167 | 333 | 2130 | 344 | Yes |
| Akbari, M | 142 | 53 | 1 | 185 | 63 | 2 | 337 | 55 | 433 | 67 | Yes |
| Betti, M | 95 | 36 | 2 | 179 | 64 | 8 | 226 | 40 | 422 | 80 | Yes |
| Bye, H (B) | 225 | 111 | 10 | 300 | 155 | 14 | 561 | 131 | 755 | 183 | Yes |
| Bye, H (M) | 120 | 65 | 11 | 294 | 116 | 13 | 305 | 87 | 704 | 142 | Yes |
| Chae, M W | 344 | 84 | 4 | 341 | 81 | 10 | 772 | 92 | 763 | 101 | Yes |
| Doecke, J | 416 | 136 | 14 | 1029 | 281 | 27 | 968 | 164 | 2339 | 335 | Yes |
| Feng, X X | 96 | 58 | 47 | 87 | 85 | 29 | 250 | 152 | 259 | 143 | Yes |
| Felini, M J | 289 | 84 | 6 | 369 | 84 | 6 | 662 | 96 | 822 | 96 | Yes |
| Hall, J | 548 | 193 | 38 | 730 | 281 | 23 | 1289 | 269 | 1741 | 327 | Yes |
| Han, J | 964 | 279 | 33 | 1306 | 382 | 26 | 2207 | 345 | 2994 | 434 | Yes |
| Han, J(E) | 344 | 82 | 8 | 822 | 242 | 21 | 770 | 98 | 1886 | 284 | Yes |
| Huang, J | 372 | 156 | 11 | 592 | 198 | 10 | 900 | 178 | 1382 | 218 | Yes |
| Huang, S H | 151 | 25 | 0 | 89 | 21 | 0 | 327 | 25 | 199 | 21 | Yes |
| Huang, W | 386 | 117 | 11 | 529 | 204 | 21 | 889 | 139 | 1262 | 246 | Yes |
| Huang, W Y | 190 | 82 | 8 | 279 | 99 | 9 | 462 | 98 | 657 | 117 | Yes |
| Hung, R J | 366 | 143 | 19 | 1121 | 391 | 33 | 875 | 181 | 2633 | 457 | Yes |
| Kietthubthew, S | 84 | 21 | 1 | 130 | 33 | 1 | 189 | 23 | 293 | 35 | Yes |
| Li, C | 132 | 34 | 1 | 173 | 28 | 3 | 298 | 36 | 374 | 34 | Yes |
| Liu, R Q | 73 | 15 | 0 | 89 | 11 | 0 | 161 | 15 | 189 | 11 | Yes |
| Liu, R Q(L) | 53 | 7 | 0 | 89 | 11 | 0 | 113 | 7 | 189 | 11 | Yes |
| Liu, S H | 82 | 16 | 2 | 57 | 8 | 0 | 180 | 20 | 122 | 8 | Yes |
| Loh, Y H | 146 | 37 | 5 | 894 | 212 | 14 | 329 | 47 | 2000 | 240 | Yes |
| Lu, Y | 142 | 45 | 4 | 186 | 59 | 6 | 329 | 53 | 431 | 71 | Yes |
| O'Mar, T A(A) | 889 | 261 | 23 | 810 | 270 | 19 | 2039 | 307 | 1890 | 308 | Yes |
| O'Mar, T A(P) | 278 | 108 | 11 | 296 | 103 | 7 | 664 | 130 | 695 | 117 | Yes |
| Palli, D | 210 | 77 | 4 | 395 | 131 | 11 | 497 | 85 | 921 | 153 | Yes |
| Ritchey, J D | 123 | 36 | 2 | 213 | 32 | 1 | 282 | 40 | 458 | 34 | Yes |
| Shah, M A | 64 | 26 | 2 | 57 | 20 | 0 | 154 | 30 | 134 | 20 | Yes |
| Shen, J | 778 | 265 | 21 | 824 | 263 | 20 | 1821 | 307 | 1911 | 303 | Yes |
| Shen, M | 432 | 112 | 11 | 373 | 110 | 12 | 976 | 134 | 856 | 134 | Yes |
| Shi, J Y | 253 | 47 | 3 | 459 | 91 | 4 | 553 | 53 | 1009 | 99 | Yes |
| Stern, M C | 251 | 40 | 1 | 959 | 194 | 13 | 542 | 42 | 2112 | 220 | Yes |
| Tranah, G J(NHS) | 147 | 33 | 6 | 1634 | 471 | 32 | 327 | 45 | 3739 | 535 | Yes |
| Tranah, G J(PHS) | 204 | 47 | 6 | 330 | 93 | 6 | 455 | 59 | 753 | 105 | Yes |
| Wang, L | 832 | 259 | 30 | 872 | 272 | 19 | 1923 | 319 | 2016 | 310 | Yes |
| Yang, F | 33 | 14 | 1 | 289 | 58 | 5 | 80 | 16 | 636 | 68 | Yes |
| Zhang, M D | 352 | 53 | 1 | 631 | 144 | 7 | 757 | 55 | 1406 | 158 | Yes |
| Zhang, Z | 563 | 151 | 7 | 933 | 284 | 17 | 1277 | 165 | 2150 | 318 | Yes |
| Zienolddiny, S | 189 | 102 | 13 | 247 | 106 | 10 | 480 | 128 | 600 | 126 | Yes |

(b), Ile143Val

| Author | Case | | | Control | | | Case | | Control | | HWE |
| --- | --- | --- | --- | --- | --- | --- | --- | --- | --- | --- | --- |
| Ile/Ile | Ile/Val | Val/Val | Ile/Ile | Ile/Val | Val/Val | Ile | Val | Ile | Val |
| Agalliu, I(AF) | 130 | 10 | 0 | 73 | 7 | 0 | 270 | 10 | 153 | 7 | Yes |
| Agalliu, I(CA) | 926 | 267 | 14 | 922 | 256 | 17 | 2119 | 295 | 2100 | 290 | Yes |
| Doecke, J | 401 | 149 | 16 | 1003 | 308 | 28 | 951 | 181 | 2314 | 364 | Yes |
| Felini, M J | 291 | 76 | 2 | 359 | 75 | 7 | 658 | 80 | 793 | 89 | Yes |
| Han, J | 340 | 99 | 6 | 838 | 234 | 17 | 779 | 111 | 1910 | 268 | Yes |
| Huang, J | 413 | 113 | 13 | 621 | 171 | 8 | 939 | 139 | 1413 | 187 | Yes |
| Huang, W | 434 | 96 | 6 | 570 | 180 | 12 | 964 | 108 | 1320 | 204 | Yes |
| Huang, W Y | 216 | 61 | 4 | 310 | 73 | 7 | 493 | 69 | 693 | 87 | Yes |
| Hung, R J | 1696 | 538 | 45 | 2594 | 675 | 51 | 3930 | 628 | 5863 | 777 | Yes |
| Jiao, L | 297 | 77 | 4 | 276 | 73 | 5 | 671 | 85 | 625 | 83 | Yes |
| Kaur, T B(AF) | 70 | 11 | 0 | 76 | 5 | 0 | 151 | 11 | 157 | 5 | Yes |
| Kaur, T B(CA) | 41 | 12 | 0 | 47 | 8 | 0 | 94 | 12 | 102 | 8 | Yes |
| Khatami, F | 125 | 74 | 1 | 146 | 52 | 2 | 324 | 76 | 344 | 56 | Yes |
| Liu, S H | 76 | 0 | 0 | 49 | 1 | 0 | 152 | 0 | 99 | 1 | Yes |
| Loh, Y H (B) | 196 | 76 | 4 | 1146 | 336 | 16 | 468 | 84 | 2628 | 368 | Yes |
| Loh, Y H (C) | 209 | 60 | 4 | 2322 | 632 | 30 | 478 | 68 | 5276 | 692 | Yes |
| Loh, Y H (P) | 238 | 72 | 2 | 1176 | 296 | 14 | 548 | 76 | 2648 | 324 | Yes |
| Moreno, V | 290 | 63 | 6 | 261 | 61 | 1 | 643 | 75 | 583 | 63 | Yes |
| O'Mar, T A(A) | 924 | 231 | 15 | 861 | 220 | 10 | 2079 | 261 | 1942 | 240 | Yes |
| O'Mar, T A(P) | 305 | 83 | 8 | 317 | 80 | 7 | 693 | 99 | 714 | 94 | Yes |
| Ritchey, J D | 155 | 5 | 1 | 243 | 5 | 0 | 315 | 7 | 491 | 5 | Yes |
| Shah, M A | 77 | 15 | 0 | 63 | 14 | 0 | 169 | 15 | 140 | 14 | Yes |
| Shen, J | 829 | 224 | 11 | 843 | 250 | 10 | 1882 | 246 | 1936 | 270 | Yes |
| Shen, M | 388 | 130 | 16 | 367 | 104 | 6 | 906 | 162 | 838 | 116 | Yes |
| Shi, J Y | 297 | 8 | 0 | 551 | 8 | 0 | 602 | 8 | 1110 | 8 | Yes |
| Tranah, G J(NHS) | 163 | 27 | 0 | 1614 | 487 | 50 | 353 | 27 | 3715 | 587 | Yes |
| Tranah, G J(PHS) | 204 | 49 | 7 | 348 | 76 | 7 | 457 | 63 | 772 | 90 | Yes |
| Wang, L | 836 | 269 | 16 | 903 | 244 | 16 | 1941 | 301 | 2050 | 276 | Yes |
| Yu, H J | 427 | 5 | 0 | 907 | 8 | 0 | 859 | 5 | 1822 | 8 | Yes |
| Yu, L | 48 | 3 | 0 | 95 | 14 | 0 | 99 | 3 | 204 | 14 | Yes |
| Zienolddiny, S | 242 | 80 | 9 | 290 | 99 | 15 | 564 | 98 | 679 | 129 | Yes |

(c), Lys178Arg

| Author | Case | | | Control | | | Case | | Control | | HWE |
| --- | --- | --- | --- | --- | --- | --- | --- | --- | --- | --- | --- |
| AA | AG | GG | AA | AG | GG | A | G | A | G |
| Agalliu, I(AF) | 134 | 11 | 0 | 75 | 8 | 0 | 279 | 11 | 158 | 8 | Yes |
| Agalliu, I(CA) | 950 | 276 | 22 | 960 | 266 | 20 | 2176 | 320 | 2186 | 306 | Yes |
| Akbari, M | 163 | 30 | 3 | 213 | 35 | 3 | 356 | 36 | 461 | 41 | Yes |
| Crosbie, P A J | 200 | 50 | 1 | 257 | 93 | 8 | 450 | 52 | 607 | 109 | Yes |
| Dong, X | 211 | 78 | 6 | 163 | 65 | 6 | 500 | 90 | 391 | 77 | Yes |
| Hazra, A | 303 | 52 | 1 | 266 | 84 | 6 | 658 | 54 | 616 | 96 | Yes |
| Huang, J | 421 | 105 | 13 | 645 | 147 | 8 | 947 | 131 | 1437 | 163 | Yes |
| Shen, J | 859 | 197 | 11 | 878 | 219 | 13 | 1915 | 219 | 1975 | 245 | Yes |
| Shen, M | 398 | 131 | 16 | 384 | 108 | 6 | 927 | 163 | 876 | 120 | Yes |
| Shi, J Y | 297 | 8 | 0 | 543 | 8 | 0 | 602 | 8 | 1094 | 8 | Yes |
| Yang, F | 71 | 0 | 0 | 484 | 8 | 0 | 142 | 0 | 976 | 8 | Yes |
| Yang, M | 72 | 20 | 0 | 69 | 16 | 0 | 164 | 20 | 154 | 16 | Yes |
| Yu, H J | 427 | 5 | 0 | 907 | 8 | 0 | 859 | 5 | 1822 | 8 | Yes |

(d), -485C/A

| Author | Case | | | Control | | | Case | | Control | | HWE |
| --- | --- | --- | --- | --- | --- | --- | --- | --- | --- | --- | --- |
| CC | AC | AA | CC | AC | AA | C | A | C | A |
| Chae, M W | 182 | 197 | 53 | 206 | 192 | 34 | 561 | 303 | 604 | 260 | Yes |
| Shi, J Y | 89 | 71 | 19 | 273 | 226 | 57 | 249 | 109 | 772 | 340 | Yes |
| Wang, L | 526 | 486 | 109 | 536 | 505 | 122 | 1538 | 704 | 1577 | 749 | Yes |
| Yu, L | 21 | 25 | 5 | 63 | 37 | 9 | 67 | 35 | 163 | 55 | Yes |
| Zhang, Z | 294 | 337 | 90 | 550 | 525 | 159 | 925 | 517 | 1625 | 843 | Yes |

(e), Leu53Leu

| Author | Case | | | Control | | | Case | | Control | | HWE |
| --- | --- | --- | --- | --- | --- | --- | --- | --- | --- | --- | --- |
| CC | TC | TT | CC | CT | TT | C | T | C | T |
| Chae, M W | 343 | 85 | 4 | 339 | 83 | 10 | 771 | 93 | 761 | 103 | Yes |
| Gu, S | 11 | 19 | 18 | 9 | 20 | 21 | 41 | 55 | 38 | 62 | Yes |
| Huang, S H | 151 | 25 | 0 | 89 | 21 | 0 | 327 | 25 | 199 | 21 | Yes |
| Li, C | 129 | 34 | 4 | 173 | 28 | 3 | 292 | 42 | 374 | 34 | Yes |
| Lu, Y | 144 | 41 | 6 | 181 | 62 | 8 | 329 | 53 | 424 | 78 | Yes |
| Yu, L | 39 | 12 | 0 | 87 | 19 | 3 | 90 | 12 | 193 | 25 | Yes |
| Zhang, Z | 575 | 136 | 10 | 963 | 252 | 19 | 1286 | 156 | 2178 | 290 | Yes |
| Zienolddiny, S | 259 | 71 | 3 | 324 | 78 | 5 | 589 | 77 | 726 | 88 | Yes |

Supplement table 2 Summary of different comparative results for all five polymorphisms

| Leu84Phe | N | Cases/Controls | Phe/Phe+Phe/Leu vs. Leu/Leu | | Phe/Phe vs. Leu/Leu+Phe/Leu | | Phe/Phe vs. Leu/Leu | | Phe/Leu vs. Leu/Leu | | Phe vs. Leu | |
| --- | --- | --- | --- | --- | --- | --- | --- | --- | --- | --- | --- | --- |
| OR(95%CI) | *P* | OR(95%CI) | *P* | OR(95%CI) | *P* | OR(95%CI) | *P* | OR(95%CI) | *P* |
| Total | 41 | 16643/26720 | 1.02(0.96, 1.09) | 0.45 | **1.32(1.15, 1.52)** | **<0.0001** | **1.30(1.13, 1.50)** | **0.0002** | 1.00(0.94, 1.07) | 0.95 | 1.04(0.99, 1.10) | 0.13 |
| Subgroup by ethnicity |  |  |  |  |  |  |  |  |  |  |  |  |
| Asian | 17 | 3558/5854 | 1.06(0.90, 1.25) | 0.52 | 1.21(0.88, 1.67) | 0.25 | 1.11(0.79, 1.54) | 0.56 | 1.05(0.89, 1.24) | 0.57 | 1.07(0.92, 1.24) | 0.37 |
| Caucasian | 15 | 9468/13462 | 1.00(0.94, 1.07) | 0.94 | **1.36(1.13, 1.64)** | **0.001** | **1.36(1.13, 1.63)** | **0.001** | 0.97(0.91, 1.04) | 0.42 | 1.03(0.97, 1.10) | 0.35 |
| Mixed | 6 | 2928/6431 | 1.00(0.86, 1.17) | 0.97 | 1.29(0.94, 1.77) | 0.11 | 1.29(0.94, 1.76) | 0.12 | 0.98(0.84, 1.14) | 0.78 | 1.03(0.90, 1.18) | 0.69 |
| Others | 3 | 689/973 | 1.14(0.86, 1.51) | 0.36 | 1.46(0.84, 2.53) | 0.18 | 1.51(0.86, 2.63) | 0.15 | 1.09(0.86, 1.39) | 0.47 | 1.16(0.89, 1.52) | 0.28 |
| Subgroup by cancer type |  |  |  |  |  |  |  |  |  |  |  |  |
| Esophageal | 7 | 1697/2822 | 1.12(0.97, 1.29) | 0.11 | **1.51(1.10, 2.08)** | **0.01** | **1.41(1.02, 1.97)** | **0.04** | 1.06(0.88, 1.29) | 0.53 | **1.15(1.02, 1.29)** | **0.02** |
| Lung | 5 | 2445/3603 | 1.10(0.98, 1.24) | 0.12 | **1.42(1.01, 2.01)** | **0.05** | **1.46(1.03, 2.06)** | **0.03** | 1.07(0.95, 1.22) | 0.26 | **1.12(1.00, 1.24)** | **0.04** |
| Colorectal | 3 | 735/3732 | 0.83(0.67, 1.02) | 0.08 | 1.37(0.72, 2.60) | 0.34 | 1.31(0.68, 2.50) | 0.42 | **0.79(0.64, 0.99)** | **0.04** | 0.88(0.72, 1.06) | 0.18 |
| Endometrail | 3 | 2004/2590 | 0.93(0.78, 1.10) | 0.39 | 1.17(0.76, 1.80) | 0.49 | 1.14(0.74, 1.76) | 0.55 | 0.91(0.77, 1.06) | 0.23 | 0.95(0.81, 1.12) | 0.57 |
| Prostate | 3 | 1558/1564 | 1.21(0.74, 2.00) | 0.44 | 1.54(0.93, 2.56) | 0.09 | 1.51(0.91, 2.51) | 0.11 | 1.15(0.69, 1.92) | 0.58 | 1.25(0.81, 1.94) | 0.32 |
| Gastric | 3 | 762/1175 | 1.11(0.90, 1.36) | 0.33 | 0.93(0.49, 1.75) | 0.82 | 0.96(0.51, 1.81) | 0.89 | 1.12(0.91, 1.38) | 0.29 | 1.08(0.90, 1.29) | 0.43 |
| Other cancers | 17 | 7442/11234 | 1.01(0.91, 1.12) | 0.86 | **1.26(1.01, 1.58)** | **0.04** | 1.26(1.00, 1.57) | 0.05 | 1.00(0.90, 1.10) | 0.93 | 1.02(0.93, 1.13) | 0.68 |
| Ile143Val | N | Cases/Controls | Val/Val+Val/Ile vs. Ile/Ile | | Val/Val vs. Ile/Ile+Val/Ile | | Val/Val vs. Ile/Ile | | Val/Ile vs. Ile/Ile | | Val vs. Ile | |
| OR(95%CI) | *P* | OR(95%CI) | *P* | OR(95%CI) | *P* | OR(95%CI) | *P* | OR(95%CI) | *P* |
| Total | 31 | 14477/25579 | 1.07(0.99, 1.16) | 0.08 | 1.14(0.95, 1.37) | 0.17 | 1.16(0.96, 1.39) | 0.12 | 1.07(0.99, 1.15) | 0.08 | 1.07(0.99, 1.15) | 0.08 |
| Subgroup by ethnicity |  |  |  |  |  |  |  |  |  |  |  |  |
| Asian | 8 | 1856/2958 | 1.19(0.92, 1.55) | 0.19 | 2.10(0.96, 4.59) | 0.06 | 2.15(0.98, 4.72) | 0.06 | 1.16(0.87, 1.54) | 0.31 | 1.19(0.99, 1.44) | 0.07 |
| Caucasian | 14 | 7324/13898 | **1.11(1.03, 1.19)** | **0.004** | 1.16(0.90, 1.48) | 0.24 | 1.18(0.93, 1.52) | 0.18 | **1.11(1.03, 1.19)** | **0.007** | **1.10(1.03, 1.18)** | **0.003** |
| Mixed | 7 | 5076/8562 | 0.93(0.74, 1.16) | 0.5 | 1.01(0.75, 1.37) | 0.94 | 1.02(0.75, 1.37) | 0.91 | 0.94(0.76, 1.16) | 0.56 | 0.92(0.75, 1.14) | 0.44 |
| Others | 2 | 221/161 | 1.35(0.46, 3.93) | 0.58 | - | - | - | - | 1.35(0.46, 3.93) | 0.58 | 1.33(0.48, 3.68) | 0.58 |
| Subgroup by cancer type |  |  |  |  |  |  |  |  |  |  |  |  |
| Lung | 5 | 3865/5023 | 1.19(1.06, 1.34) | 0.003 | 1.13(0.82, 1.56) | 0.47 | 1.17(0.85, 1.61) | 0.35 | **1.20(1.08, 1.33)** | **0.0005** | **1.15(1.02, 1.30)** | **0.02** |
| Esophageal | 5 | 1217/2490 | 1.14(0.88, 1.46) | 0.32 | 1.36(0.73, 2.54) | 0.33 | 1.43(0.77, 2.67) | 0.26 | 1.14(0.92, 1.42) | 0.23 | 1.16(0.97, 1.39) | 0.11 |
| Colorectal | 5 | 1282/6089 | 1.00(0.71, 1.41) | 0.99 | 1.10(0.61, 1.96) | 0.75 | 1.07(0.60, 1.91) | 0.81 | 1.00(0.73, 1.37) | 0.99 | 1.00(0.73, 1.38) | 0.99 |
| PCA | 4 | 1820/3009 | 1.07(0.92, 1.25) | 0.38 | 0.85(0.46, 1.58) | 0.61 | 0.86(0.47, 1.61) | 0.65 | 1.08(0.93, 1.27) | 0.32 | 1.05(0.91, 1.21) | 0.50 |
| Endometrail | 3 | 2011/2584 | 1.02(0.89, 1.18) | 0.75 | 1.15(0.68, 1.92) | 0.60 | 1.15(0.69, 1.94) | 0.59 | 1.02(0.88, 1.18) | 0.84 | 1.03(0.90, 1.17) | 0.67 |
| Other cancers | 9 | 4282/6384 | 1.05(0.91, 1.22) | 0.50 | 1.21(0.85, 1.73) | 0.29 | 1.22(0.85, 1.74) | 0.28 | 1.04(0.90, 1.21) | 0.57 | 1.05(0.92, 1.21) | 0.46 |
| Lys178Arg | N | Cases/Controls | GG+GA vs. AA | | GG vs. AA+GA | | GG vs. AA | | GA vs. AA | | G vs. A | |
| OR(95%CI) | *P* | OR(95%CI) | *P* | OR(95%CI) | *P* | OR(95%CI) | *P* | OR(95%CI) | *P* |
| Total | 13 | 5542/6979 | 0.96(0.82, 1.12) | 0.59 | 1.10(0.66, 1.83) | 0.73 | 1.08(0.63, 1.85) | 0.79 | 0.96(0.87, 1.06) | 0.48 | 0.97(0.82, 1.14) | 0.67 |
| Subgroup by ethnicity |  |  |  |  |  |  |  |  |  |  |  |  |
| Asian | 5 | 1543/3009 | 1.19(0.95, 1.49) | 0.14 | 2.11(0.97, 4.58) | 0.06 | 2.14(0.98, 4.67) | 0.06 | 1.13(0.89, 1.42) | 0.31 | 1.22(0.99, 1.50) | 0.06 |
| Caucasian | 4 | 2136/2187 | 1.00(0.77, 1.30) | 0.99 | 1.10(0.39, 3.04) | 0.86 | 1.08(0.37, 3.16) | 0.88 | 1.00(0.81, 1.24) | 0.97 | 1.00(0.76, 1.32) | 0.98 |
| Others | 4 | 1863/1783 | 0.77(0.57, 1.04) | 0.09 | 0.72(0.37, 1.41) | 0.34 | 0.68(0.33, 1.43) | 0.31 | 0.79(0.60, 1.04) | 0.10 | 0.78(0.58, 1.04) | 0.09 |
| Leu53Leu | N | Cases/Controls | TT+TC vs CC | | TT vs TC+CC | | TT vs. CC | | TC vs. CC | | T vs. C | |
| OR(95%CI) | *P* | OR(95%CI) | *P* | OR(95%CI) | *P* | OR(95%CI) | *P* | OR(95%CI) | *P* |
| Total | 8 | 2119/2797 | 0.97(0.84, 1.11) | 0.65 | 0.80(0.53, 1.20) | 0.27 | 0.77(0.50, 1.19) | 0.24 | 0.99(0.85, 1.14) | 0.85 | 0.95(0.84, 1.08) | 0.45 |
| -485A/C | N | Cases/Controls | AA+AC vs. CC | | AA vs. CC+AC | | AA vs. CC | | AC vs. CC | | A vs. C | |
| OR(95%CI) | *P* | OR(95%CI) | *P* | OR(95%CI) | *P* | OR(95%CI) | *P* | OR(95%CI) | *P* |
| Total | 5 | 2504/3494 | 1.09(0.98, 1.21) | 0.12 | 1.03(0.87, 1.22) | 0.71 | 1.08(0.91, 1.29) | 0.39 | 1.09(0.98, 1.22) | 0.12 | 1.06(0.98, 1.14) | 0.18 |

The bold values mean that their association is significant

**Supplement Figures Legends**

Supplement Figure 1. Meta-analysis for the association between cancer risk and the Leu84Phe polymorphism in the *MGMT* gene (Phe/Phe vs. Phe/Leu+Leu/Leu): Subgroup analysis by cancer types

Supplement Figure 2. Meta-analysis for the association between cancer risk and the Leu84Phe polymorphism in the *MGMT* gene (Phe/Phe vs. Phe/Leu+Leu/Leu): Subgroup analysis by ethnicity

Supplement Figure 3. Meta-analysis for the association between cancer risk and the Ile143Val polymorphism in the *MGMT* gene (Val/Ile+Val/Val vs. Ile/Ile): Subgroup analysis by cancer types

Supplement Figure 4. Meta-analysis for the association between cancer risk and the Ile143Val polymorphism in the *MGMT* gene (Val/Ile+Val/Val vs. Ile/Ile): Subgroup analysis by ethnicity

Supplement Figure 5. Meta-analysis for the association between cancer risk and the Lys178Arg polymorphism in the *MGMT* gene (Arg/Arg+Arg/Lys vs. Lys/Lys): Subgroup analysis by ethnicity

Supplement Figure 1. Meta-analysis for the association between cancer risk and the Leu84Phe polymorphism in the *MGMT* gene (Phe/Phe vs. Phe/Leu+Leu/Leu): Subgroup analysis by cancer types


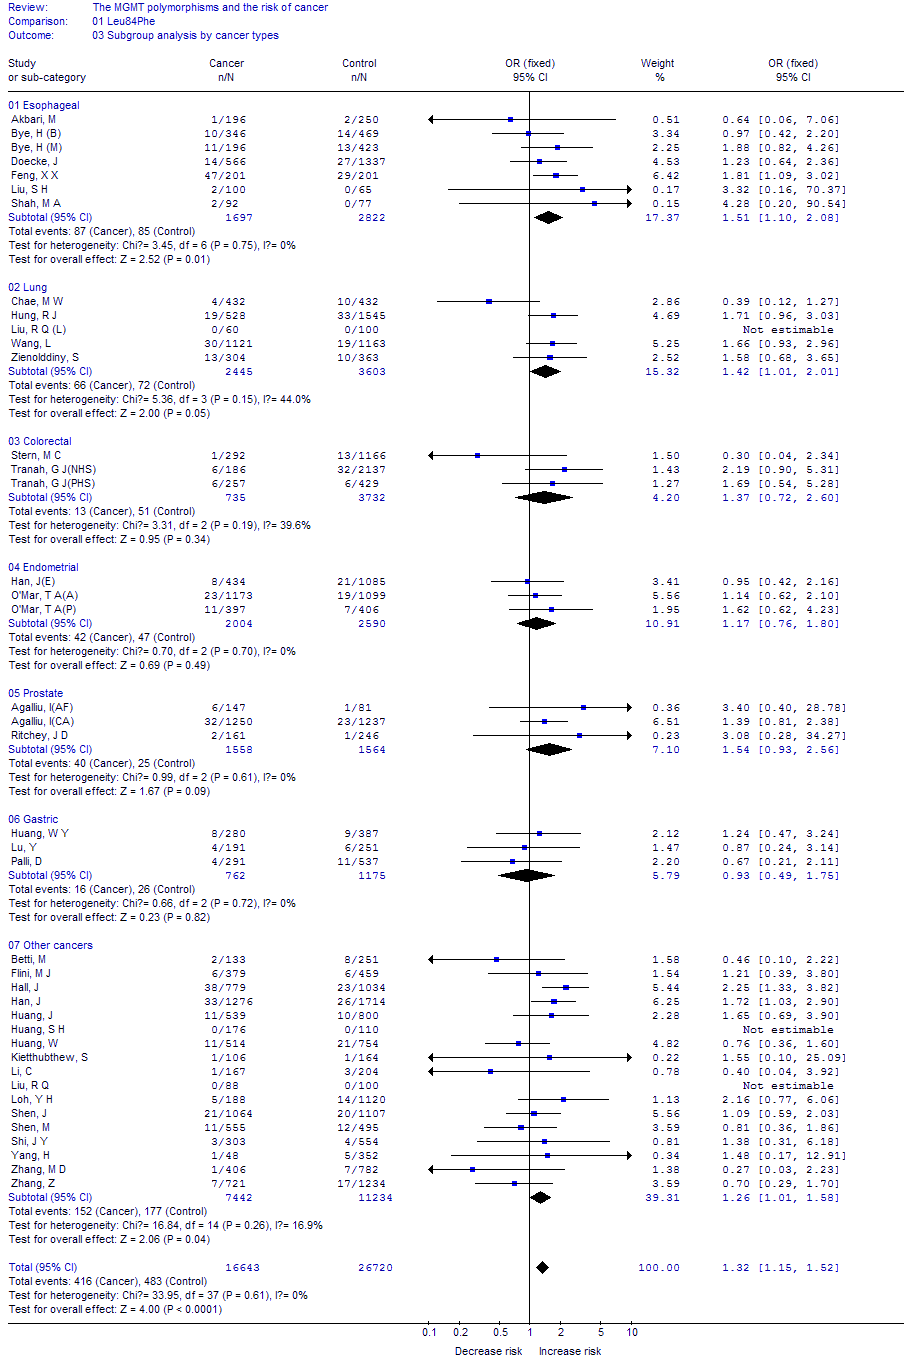


Supplement Figure 2. Meta-analysis for the association between cancer risk and the Leu84Phe polymorphism in the *MGMT* gene (Phe/Phe vs. Phe/Leu+Leu/Leu): Subgroup analysis by ethnicity


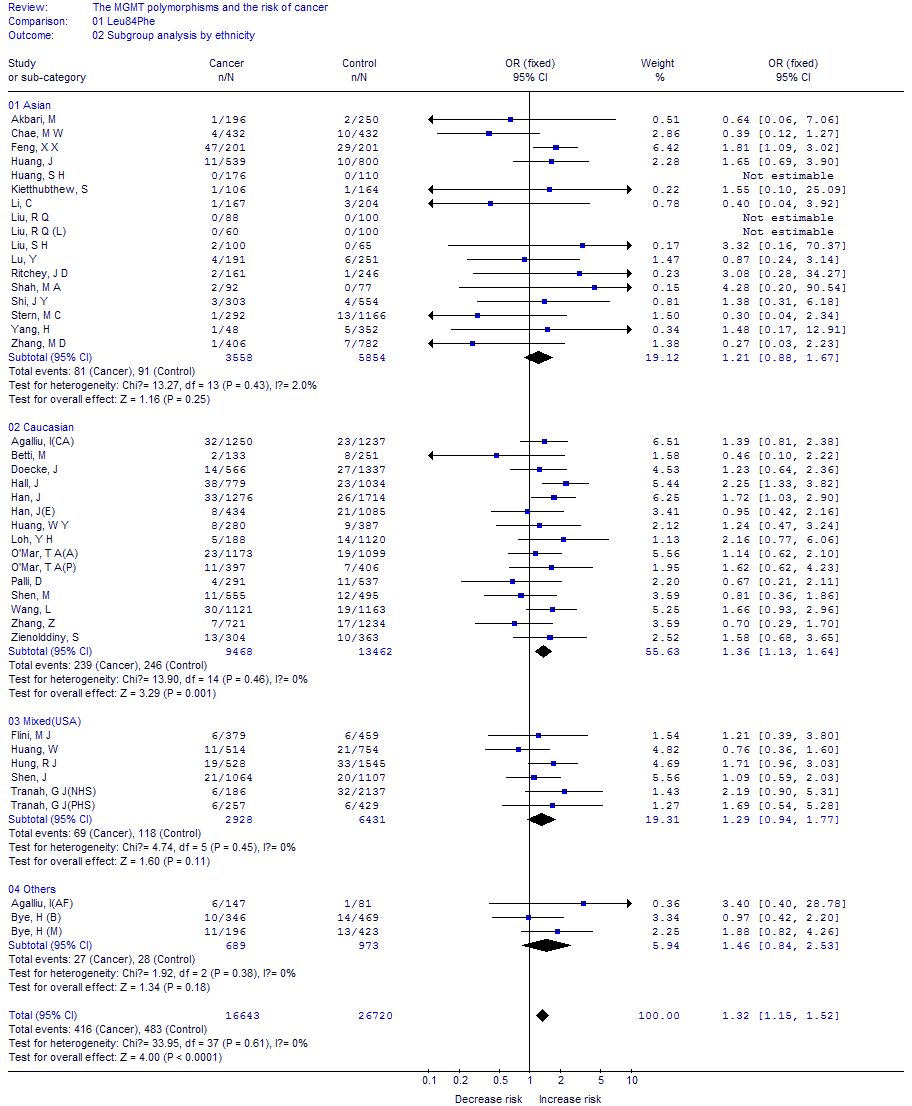


Supplement Figure 3. Meta-analysis for the association between cancer risk and the Ile143Val polymorphism in the *MGMT* gene (Val/Ile+Val/Val vs. Ile/Ile): Subgroup analysis by cancer types


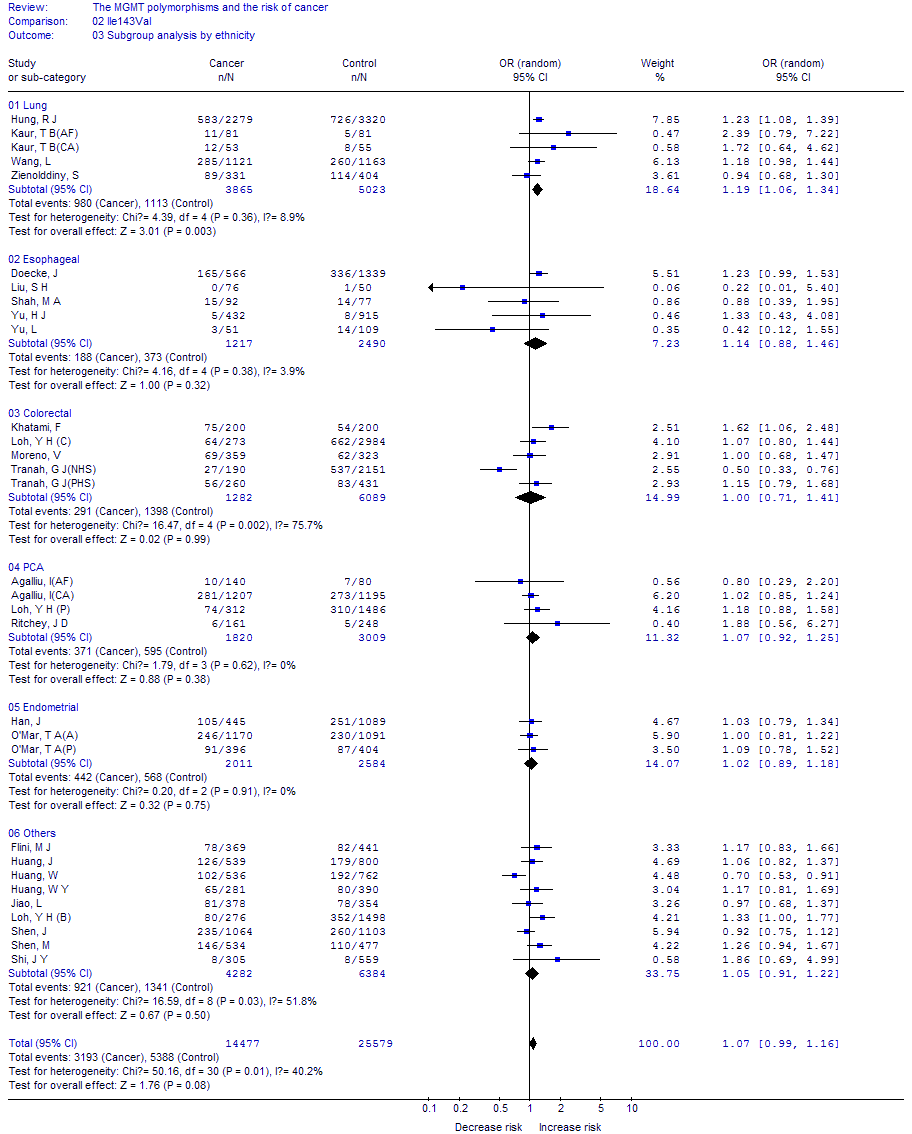


Supplement Figure 4. Meta-analysis for the association between cancer risk and the Ile143Val polymorphism in the *MGMT* gene (Val/Ile+Val/Val vs. Ile/Ile): Subgroup analysis by ethnicity


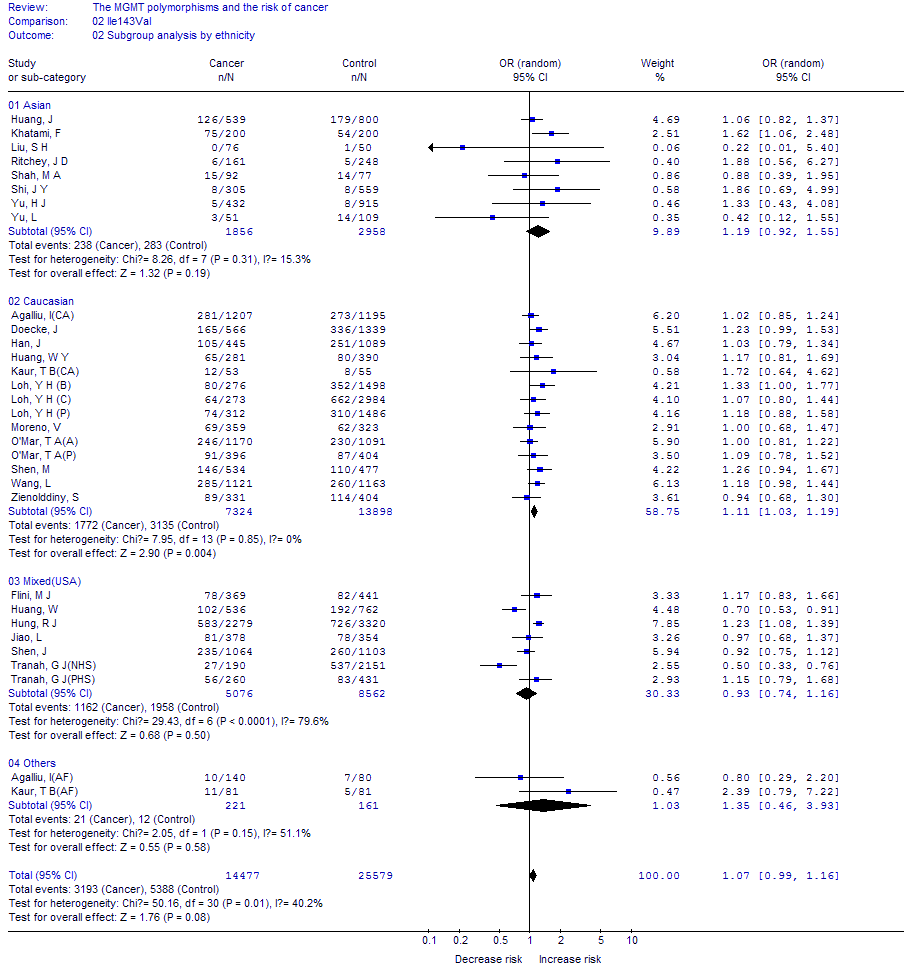


Supplement Figure 5. Meta-analysis for the association between cancer risk and the Lys178Arg polymorphism in the *MGMT* gene (Arg/Arg+Arg/Lys vs. Lys/Lys): Subgroup analysis by ethnicity


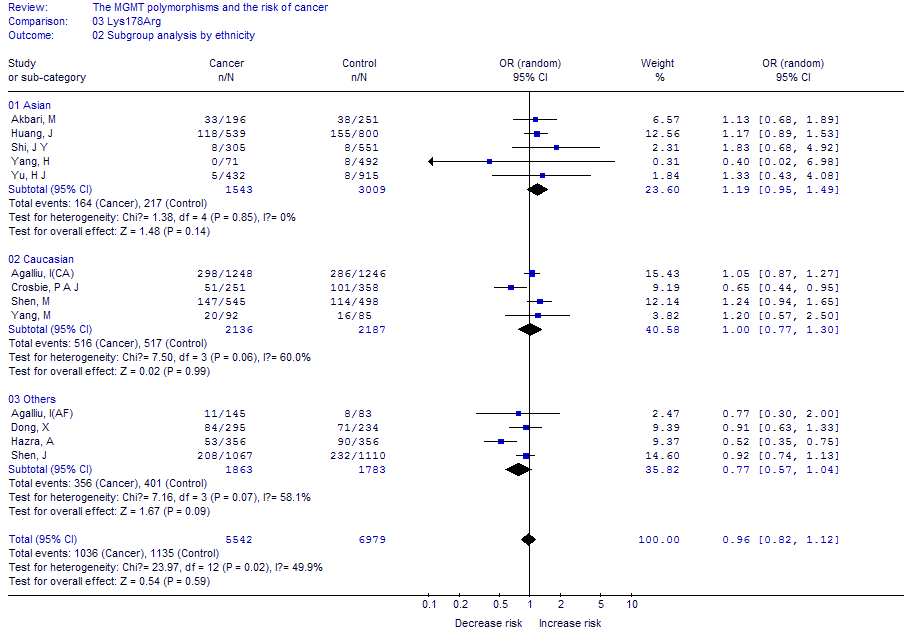


Reference:
